# Supplementary material for: Deep Structural Analysis of Myriads of Omicron Sub-Variants Revealed Hotspot for Vaccine Escape Immunity
Source: MDPI journal article supplement (doi:10.3390/vaccines11030668), 2023-03-15
Supplement: s1 [file s1]

**Table S5.** Grouping of Omicron sub-variants based on the mutations, key features, and percentage of mutations in the S2 subunit.

| <b>Group Number</b> | <b>Sub-variant(s)</b>                                                                                                          | <b>Key Features</b>                             | <b>Percentage of Mutations Carried</b> |
|---------------------|--------------------------------------------------------------------------------------------------------------------------------|-------------------------------------------------|----------------------------------------|
| 1                   | BA.4.1.10, BA.4.6, BA.4.7, BA.5, BA.5.1.18, BA.5.1.20, BA.5.2, BA.5.2.13, BA.5.3, BA.5.6, BA.5.6.2, BA.5.9, BF.11, BF.13, BM.1 | Similar to BA.4; distinctive mutation N764G.    | 100%                                   |
| -                   | BA.4                                                                                                                           | Similar to group 1; Distinctive mutation N764L. | 100%                                   |

|   |                                                                               |                                                                                                  |       |
|---|-------------------------------------------------------------------------------|--------------------------------------------------------------------------------------------------|-------|
| 2 | BM.1.1, BM.1.1.1, BM.2, BM.4.1, BN.1, BQ.1, BR.1, BR.2, BY.1, CA.1            | Similar to group 7; distinctive mutation N764L.                                                  | 77.8% |
| 3 | BA.2.75.2, BA.2.75.3, BA.2.75.4, BA.2.75.5, BA.2.75.6, BM.4.1.1, BQ.1.1, BF.7 | Similar to group 4 and variants BA.2.12.1 and BA.2.75; distinctive mutation N764K.               | 44.4% |
| 4 | BA.2.75.1, BA.2.75.7, BL.1                                                    | Similar to group 3 and variants BA.2.12.1 and BA.2.75; distinctive siteshowing no mutation N764. | 33.3% |
| - | BA.2.75                                                                       | Similar to group 3 and 4 and variant BA.2.12.1; distinctive mutation N764L.                      | 44.4% |
| - | BA.2.12.1                                                                     | Similar to group 3 and 4 and variant BA.2.75; distinctive mutation N764E.                        | 44.4% |
| 5 | BJ.1, XBB                                                                     | All unique mutations except D796F, shared with group 6.                                          | 100%  |
| 6 | BU.1, BW.1                                                                    | Shows many unique mutations when compared to other variants.                                     | 88.9% |

|   |                                  |                                                                                                         |       |
|---|----------------------------------|---------------------------------------------------------------------------------------------------------|-------|
| 7 | BA.2.10, BA.2.3.20,<br>BA.2.75.8 | Similar to group 2;<br>distinctive<br>mutation N764K.                                                   | 77.8% |
| 8 | BA.1, BA.1.1                     | Unique mutations<br>N856K and L981F. The<br>rest of the mutations are<br>shared<br>with other variants. | 66.7% |

|   |           |                                                              |       |
|---|-----------|--------------------------------------------------------------|-------|
| - | BA.2      | Mutations shared with other variants.                        | 33.3% |
| - | BS.1      | Shows many unique mutations when compared to other variants. | 88.9% |
| - | BA.2.10.4 | Shows many unique mutations when compared to other variants. | 88.9% |
