# Supplementary material for: Deep Structural Analysis of Myriads of Omicron Sub-Variants Revealed Hotspot for Vaccine Escape Immunity
Source: MDPI journal article supplement (doi:10.3390/vaccines11030668), 2023-03-15
Supplement: s1 [file s1]

**Table 4.** Grouping of Omicron sub-variants based on the mutations, key features, and percentage of mutations in the pre S1/S2 subunit.

| Group Number | Sub-variant(s)                                                                                                                       | Key Features                                                                                                | Percentage of Mutations Carried |
|--------------|--------------------------------------------------------------------------------------------------------------------------------------|-------------------------------------------------------------------------------------------------------------|---------------------------------|
| 1            | BA.2.10, BA.2.3.20, BA.2.75.8, BM.1.1, BM.1.1.1, BM.2, BM.4.1, BN.1, BQ.1, BR.1, BR.2, BY.1, CA.1                                    | Shows mostly unique mutations when compared to other variants.                                              | 100%                            |
| 2            | BA.4, BA.4.1.10, BA.4.6, BA.4.7, BA.5, BA.5.1.18, BA.5.1.20, BA.5.2, BA.5.2.13, BA.5.3, BA.5.6, BA.5.6.2, BA.5.9, BF.11, BF.13, BM.1 | Shows mostly unique mutations when compared to other variants.                                              | 100%                            |
| 3            | BA.2.12.1, BA.2.75, BA.2.75.1, BA.2.75.2, BA.2.75.3, BA.2.75.4, BA.2.75.5, BA.2.75.6, BA.2.75.7, BF.7, BL.1, BM.4.1.1, BQ.1.1        | Similar to BA.2; distinctive mutation H655Y. Shows mostly unique mutations when compared to other variants. | 66.7%                           |
| -            | BA.2                                                                                                                                 | Similar to group 3; distinctive mutation H655T.                                                             | 50%                             |
| 4            | BJ.1, XBB                                                                                                                            | Shows mostly unique mutations when compared to other variants.                                              | 100%                            |
| 5            | BU.1, BW.1                                                                                                                           | Shows mostly unique mutations when compared to other variants.                                              | 83.3%                           |
| -            | BS.1                                                                                                                                 | Shows mostly unique mutations when compared to other variants.                                              | 100%                            |

|   |           |                                                                |       |
|---|-----------|----------------------------------------------------------------|-------|
| - | BA.2.10.4 | Shows mostly unique mutations when compared to other variants. | 100%  |
| - | BA.1      | Similar to BA.1.1; distinctive mutation H655Y.                 | 83.3% |
| - | BA.1.1    | Similar to BA.1.; distinctive mutation H655T.                  | 83.3% |
