# Supplementary material for: Deep Structural Analysis of Myriads of Omicron Sub-Variants Revealed Hotspot for Vaccine Escape Immunity
Source: MDPI journal article supplement (doi:10.3390/vaccines11030668), 2023-03-15
Supplement: s1 [file s1]

**Table S2.** Grouping of Omicron sub-variants based on the mutations, key features, and percentage of mutations in the N-terminal domain.

| Group Number | Sub-variant(s)                                                                                                            | Key Features                                                                            | Percentage of Mutations Carried |
|--------------|---------------------------------------------------------------------------------------------------------------------------|-----------------------------------------------------------------------------------------|---------------------------------|
| 1            | BQ.1.1, BA.2, BA.2.12.1                                                                                                   | Similar to groups 2 and 3; distinctive sites show no mutations: K147, W152, F157, I210. | 11.5%                           |
| 2            | BA.2.75.1, BA.2.75.5                                                                                                      | Similar to groups 1 and 3; distinctive sites are G142, and G257X.                       | 26.9%                           |
| 3            | BL.1, BA.2.75.3, BA.2.75.4, BA.2.75.6, BA.2.75.7                                                                          | Similar to groups 1 and 2.                                                              | 30.8%                           |
| 4            | BM.1, BA.4, BA.4.1.10, BA.4.6, BA.4.7, BA.5, BA.5.1.20, BA.5.2, BA.5.2.13, BA.5.3, BA.5.6, BA.5.6.2, BA.5.9, BF.11, BF.13 | Distinctive mutation from BA.5.1.18 is T19I.                                            | 100%                            |
| -            | BA.5.1.18                                                                                                                 | Similar to group 4; distinctive mutation T19X.                                          | 100%                            |
| 5            | BU.1, BW.1                                                                                                                | Shares residues 19-143 and 213 with groups 6, 7 and 8.                                  | 100%                            |
| 6            | BM.1.1, BM.4.1, BR.2                                                                                                      | Similar to groups 7 and 8; distinctive mutations T19I and Y144E.                        | 96.2%                           |
| -            | BA.2.75.8                                                                                                                 | Similar to group 6; distinctive mutation T19X.                                          | 96.2%                           |

|   |                          |                                                             |       |
|---|--------------------------|-------------------------------------------------------------|-------|
| 7 | BR.1, CA.1, BM.2, BN.1   | Similar to groups 6 and 8;<br>distinctive mutation Y144X.   | 96.2% |
| - | BM.1.1.1                 | Similar to group 7; distinctive<br>mutation<br>Y144G.       | 96.2% |
| 8 | BQ.1, BA.2.3.20, BA.2.10 | Similar to groups 6 and 7;<br>distinctive mutation Y144K.   | 96.2% |
| 9 | BJ.1, XBB                | Share the same mutations in positions<br>19-95.             | 92.3% |
| - | BS.1                     |                                                             | 100%  |
| - | BA.2.10.4                |                                                             | 100%  |
| - | BA.1                     | Only two mutations<br>A67V, and T95I.                       | 7.7%  |
| - | BA.1.1                   | Unique mutations H69L,<br>and L212I.                        | 30.7% |
| - | BA.2.75                  | Unique mutations H69L, V70I,<br>G142X, V143X,<br>and L212I. | 34.6% |
| - | BA.2.75.2                | Mutations shared with<br>other variants.                    | 15.4% |
| - | BF.7                     | Mutations shared with<br>other variants.                    | 7.7%  |

|   |          |                                       |       |
|---|----------|---------------------------------------|-------|
| - | BM.4.1.1 | Mutations shared with other variants. | 26.9% |
| - | BY.1     | Mutations shared with other variants. | 92.3% |
