# Supplementary material for: Deep Structural Analysis of Myriads of Omicron Sub-Variants Revealed Hotspot for Vaccine Escape Immunity
Source: MDPI journal article supplement (doi:10.3390/vaccines11030668), 2023-03-15
Supplement: s1 [file s1]

**Table S3.** Grouping of Omicron sub-variants based on the mutations, key features, and percentage of mutations in the RBD.

| Group Number | Sub-variant(s)                                                                                                                       | Key Features                                                   | Percentage of Mutations Carried |
|--------------|--------------------------------------------------------------------------------------------------------------------------------------|----------------------------------------------------------------|---------------------------------|
| 1            | BA.4, BA.4.1.10, BA.4.6, BA.4.7, BA.5, BA.5.1.18, BA.5.1.20, BA.5.2, BA.5.2.13, BA.5.3, BA.5.6, BA.5.6.2, BA.5.9, BF.11, BF.13, BM.1 | Mutations shared with other variants.                          | 100%                            |
| 2            | BM.1.1, BM.1.1.1, BM.4.1, BY.1, CA.1                                                                                                 | Similar to group 3; distinctive mutation V483S.                | 89.3%                           |
| -            | BM.2                                                                                                                                 | Similar to group 2 and 3; distinctive mutation V483X.          | 89.3%                           |
| 3            | BA.2.75.8, BA.2.3.20, BR.1                                                                                                           | Similar to group 2; distinctive mutation V483F.                | 89.3%                           |
| -            | BR.2                                                                                                                                 | Similar to group 2 and 3; distinctive mutation V483I.          | 89.3%                           |
| 4            | BU.1, BW.1                                                                                                                           | Shows mostly unique mutations when compared to other variants. | 96.4%                           |
| 5            | BA.2.75, BA.2.75.3                                                                                                                   | Similar to BA.75.1 and BA.75.2; distinctive mutation N440K.    | 57.1%                           |
| -            | BA.2.75.1                                                                                                                            | Similar to group 5 and BA.275.2; distinctive mutation K417N.   | 57.1%                           |

|   |               |                                                                                                    |       |
|---|---------------|----------------------------------------------------------------------------------------------------|-------|
| - | BA.2.75.2     | Similar to group 5 and BA.2.75.1.                                                                  | 57.1% |
| 6 | BN.1, BA.2.10 | Similar to BQ.1; distinctive mutation V483F.                                                       | 89.3% |
| - | BQ.1          | Similar to group 6; distinctive site V483.                                                         | 85.7% |
| 7 | XBB, BJ.1     | Shows mostly unique mutations when compared to other variants.                                     | 100%  |
| - | BA.2.10.4     | Shows many unique mutations when compared to other variants.                                       | 85.7% |
| - | BA.2.12.1     | Similar to variants BA.2.75.4 and BA.2.75.7; distinctive sites G446, L452Q, N460, F486 and Q493R.  | 57.1% |
| - | BA.2.75.4     | Similar to variants BA.2.12.1 and BA.2.75.7; distinctive sites G446S, L452R, N460K, F486 and Q493. | 60.7% |
| - | BA.2.75.5     | Mutations shared with other variants.                                                              | 42.9% |
| - | BA.2.75.6     | Similar to BL.1; distinctive sites G446 and N460K.                                                 | 53.6% |

|   |           |                                                                                                                |       |
|---|-----------|----------------------------------------------------------------------------------------------------------------|-------|
| - | BA.2.75.7 | Similar to variants<br>BA.2.75.4 and BA.2.12.1;<br>distinctive sites G446S,<br>L452, N460K, F486S and<br>Q493. | 60.7% |
| - | BF.7      | Similar to BQ.1.1;<br>distinctive<br>mutationsK444T<br>and N460K.                                              | 71.4% |
